# Supplementary material for: The oceanic cycle of carbon monoxide and its emissions to the atmosphere
Source: Copernicus journal article supplement (doi:10.5194/bg-16-881-2019), 2019-02-22
Supplement: Supplementary file 1 [file bg-16-881-2019-supplement.pdf]

Supplement of Biogeosciences, 16, 881–902, 2019  
<https://doi.org/10.5194/bg-16-881-2019-supplement>  
© Author(s) 2019. This work is distributed under  
the Creative Commons Attribution 4.0 License.

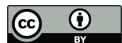

*Supplement of*

## **The oceanic cycle of carbon monoxide and its emissions to the atmosphere**

**Ludivine Conte et al.**

*Correspondence to:* Ludivine Conte ([ludivine.conte@lsce.ipsl.fr](mailto:ludivine.conte@lsce.ipsl.fr))

The copyright of individual parts of the supplement might differ from the CC BY 4.0 License.

## Supplementary Materials

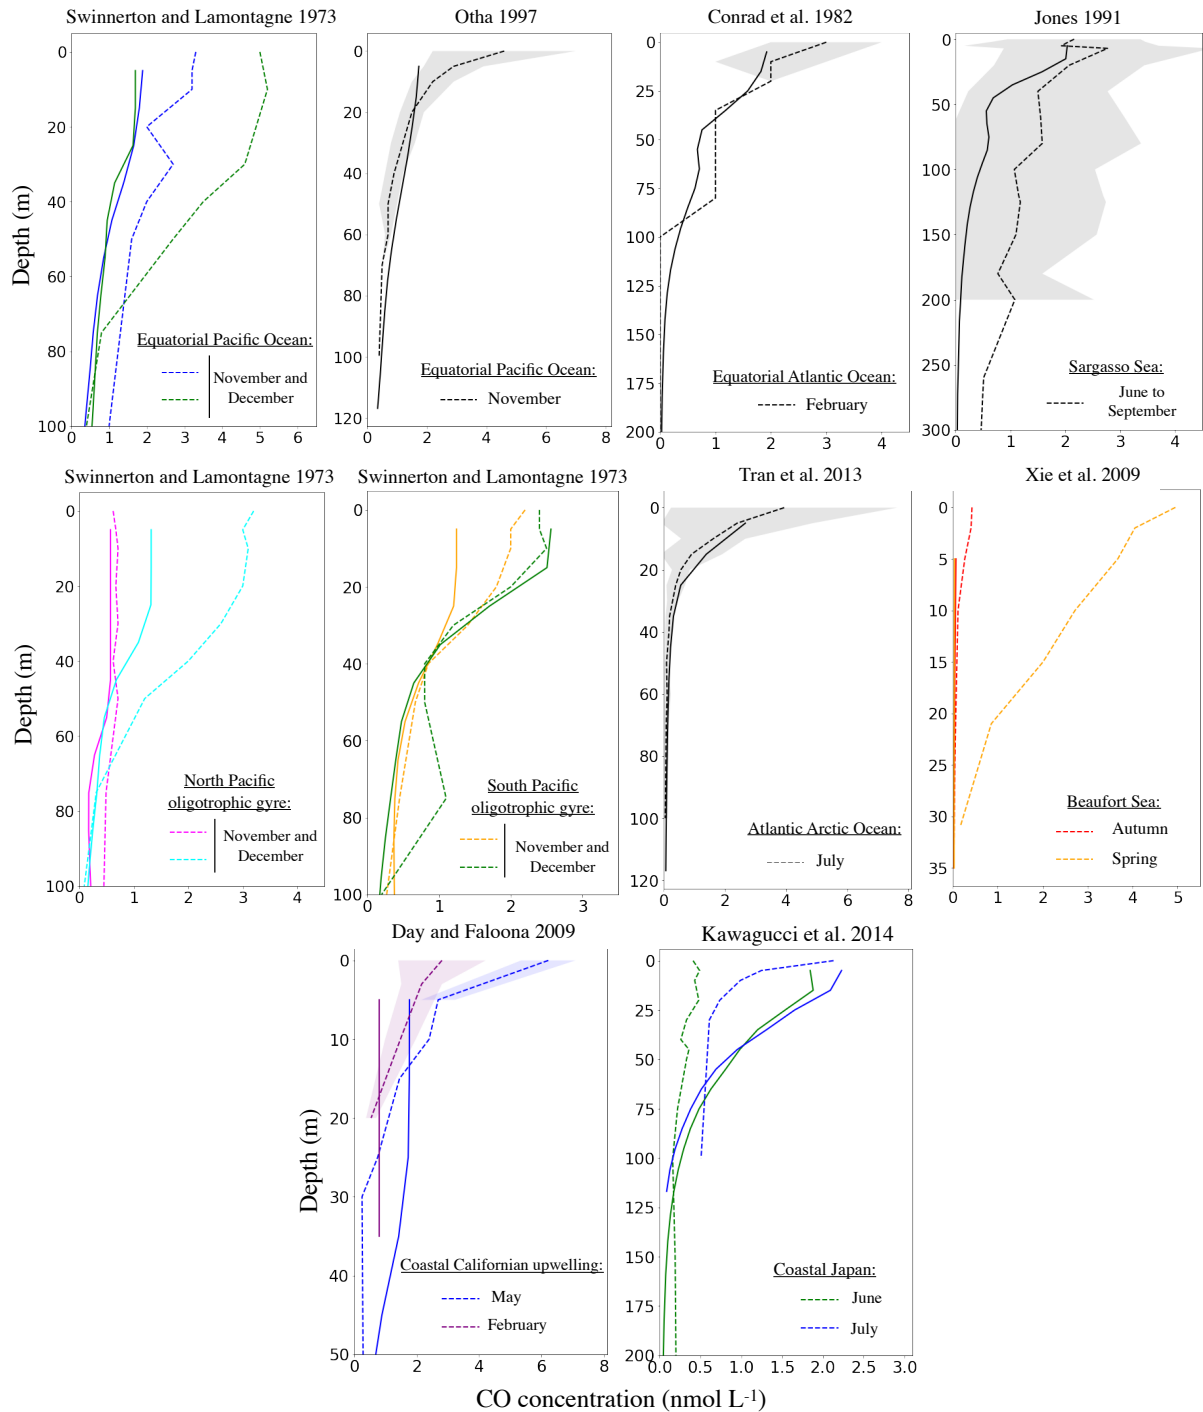

**Figure S1: comparison of simulated oceanic CO profiles with the measured ones (for the same months and location). Dotted lines represent the observed profiles and continuous lines the model output. The standard deviation of the observation, when available, is shown around each observed profiles with the shaded area of the same color.**

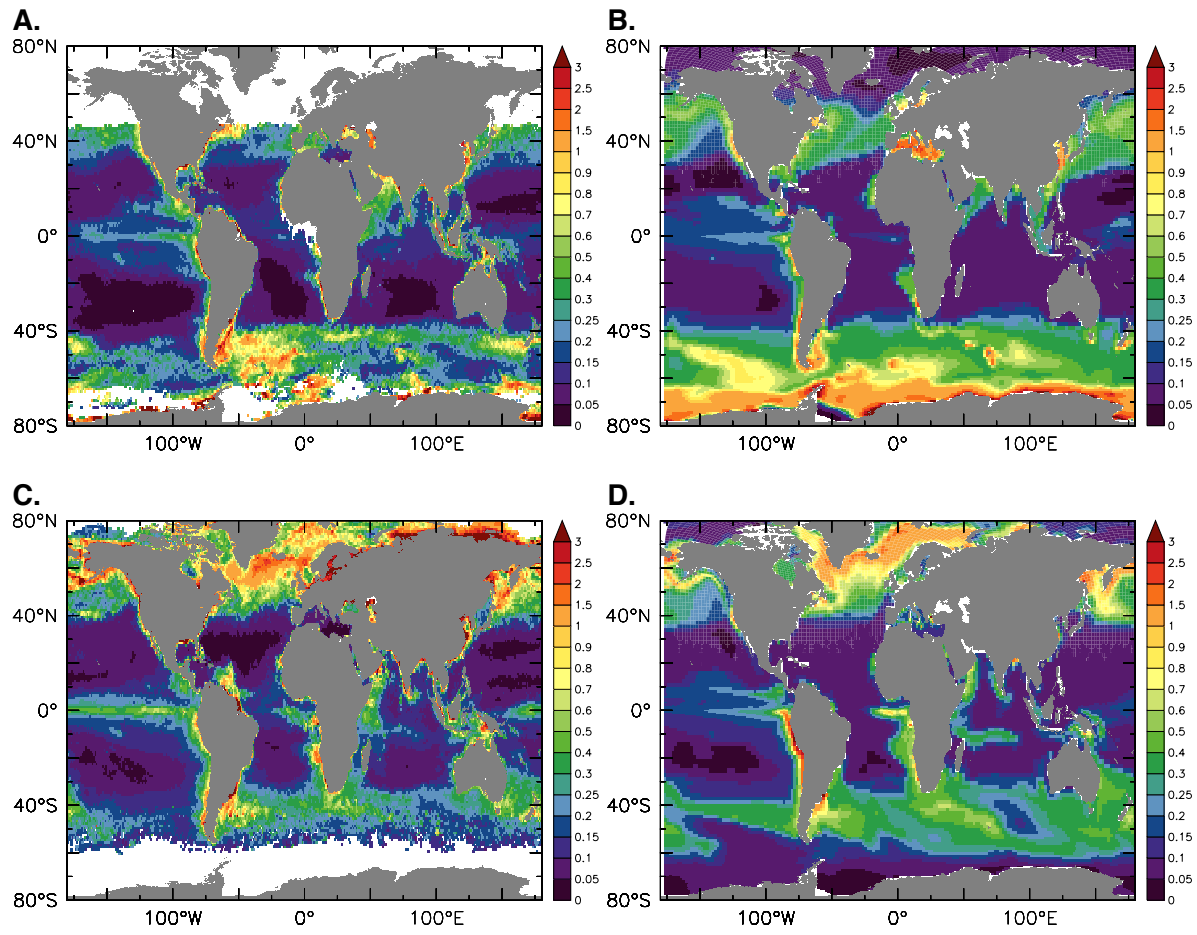

**Figure S2: Surface seasonal mean chlorophyll concentrations (mg Chla m<sup>-3</sup>) in December-January-February (panels A. and B.) and June-July-August (panels C. and D.). Panels A. and C. display satellite observations from GlobColour and panels B. and D. are PISCES model results.**

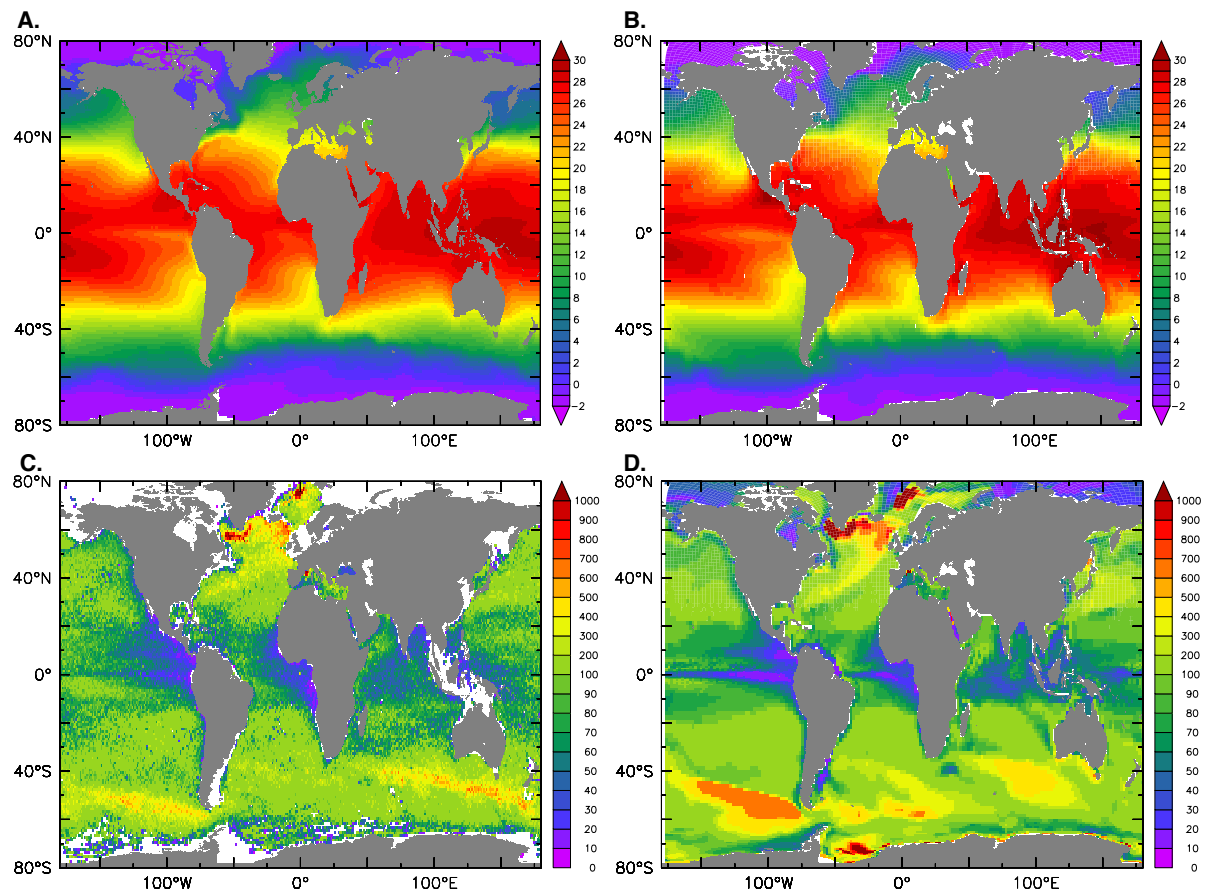

**Figure S3: annual mean Sea Surface Temperature (SST) (panels A. and B.) and maximum Mixed Layer Depth (MLD) of the annual mean (panels C. and D.). Panel A. displays SST resulting from optimum interpolation analysis produced at the National Oceanic and Atmospheric Administration using both in situ and satellite data from November 1981 to 2000 (Reynolds et al., 2002). Panel C. displays MLD resulting from a global climatology computed from nearly 1250000 Argo profiles (Holte et al., 2017). Panels B. and D. display PISCES model results.**

### **Bibliography:**

Holte, J., Talley, L.D., Gilson, J., and Roemmich, D.: An Argo mixed layer climatology and database. *Geophysical Research Letters* 44, 5618–5626, 2017.

Reynolds, R.W., Rayner, N. A., Smith, T. M., Stokes, D. C., Wang, W.: An improved in situ and satellite SST analysis for climate. *J. Climate*, 15, 1609-1625, 2002.
